# Supplementary material
Source: ML conference proceedings conference paper supplement (https://openaccess.thecvf.com/content/CVPR2026/html/Tao_Hierarchical_Visual_Relocalization_CVPR_2026_paper.html)
Supplement: Supplementary file 1 [file Tao_Hierarchical_Visual_Relocalization_CVPR_2026_supplemental.pdf]

# Hierarchical Visual Relocalization with Nearest View Synthesis from Feature Gaussian Splatting

## Supplementary Material

### Contents

- [A Details of Adaptive Viewpoint Retrieval](#)
- [B Scene Metadata](#)
- [C Mapping Quality](#)
- [D Additional Experimental Results](#)
- [E Additional Visualization](#)
- [F Gaussian Rasterization in FGS](#)

### A. Details of Adaptive Viewpoint Retrieval

The algorithm of the adaptive viewpoint retrieval strategy is illustrated in Algorithm 1.

**Hyperparameters.** The hyperparameters used in this retrieval process for indoor and outdoor scenes are summarized in Table I. These include the number of retrieved images  $k_1$  for geometric verification in the coarse stage, the number of virtual views  $k_2$  generated by pose perturbation, the number of candidate images  $k_3$  verified in the fine stage, the perturbation ranges ( $a^\circ, b$  m) for rotation and translation, and the inlier threshold  $\mathcal{I}$  used during geometric verification. Moreover, the images retrieved in the coarse stage exhibit strong viewpoint redundancy. To avoid repeated verification on nearly identical views, we perform geometric verification only on every 10th retrieved image.

Table I. Hyperparameters in the adaptive retrieval process.

| Scene Type | $k_1$ | $k_2$ | $k_3$ | $a$ | $b$ | $\mathcal{I}$ |
|------------|-------|-------|-------|-----|-----|---------------|
| Indoor     | 10    | 150   | 5     | 5   | 0.5 | 150           |
| Outdoor    | 10    | 100   | 5     | 5   | 0.8 | 300           |

**Perturbation sampling strategies** We compare multiple perturbation strategies generated using different sampling distributions on the stairs scene. As shown in Table II, Normal and Random perturbations consistently outperform Uniform sampling in both accuracy and robustness. Normal sampling yields the best localization success rate, whereas Random provides a favorable trade-off between accuracy and runtime.

**Range of perturbations.** In Fig. I, we vary the angular perturbation  $a$  on the Stairs scene. The accuracy improves as  $a$  increases from  $0^\circ$  to  $5^\circ$ , indicating that a moderate amount of angular perturbation helps the system escape degenerate initializations and yields better coarse pose candidates. However, excessively large perturbations (e.g.,  $a = 10^\circ$ )

Table II. Comparison of Uniform, Normal, and Random perturbation strategies. Time denotes the average runtime required for the initial localization.

| Distributions | Avg. Err [cm/°] ↓ | $R@[5\text{cm}, 5^\circ]$ ↑ | Time (s) ↓  |
|---------------|-------------------|-----------------------------|-------------|
| Uniform       | 1.11/0.33         | 85.3                        | 0.60        |
| Normal        | <b>1.03/0.30</b>  | <b>92.8</b>                 | 0.60        |
| Random        | <b>1.03/0.30</b>  | 91.9                        | <b>0.57</b> |

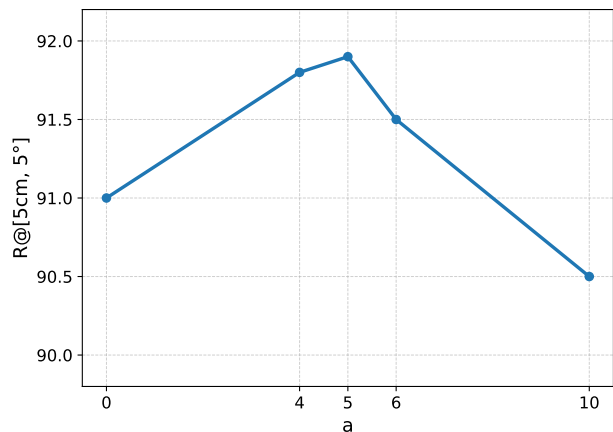

Figure I. The  $R@[5\text{cm}, 5^\circ]$  accuracy under different perturbation angle values  $a$ , with the perturbation distance  $b$  fixed to 0.5 m.

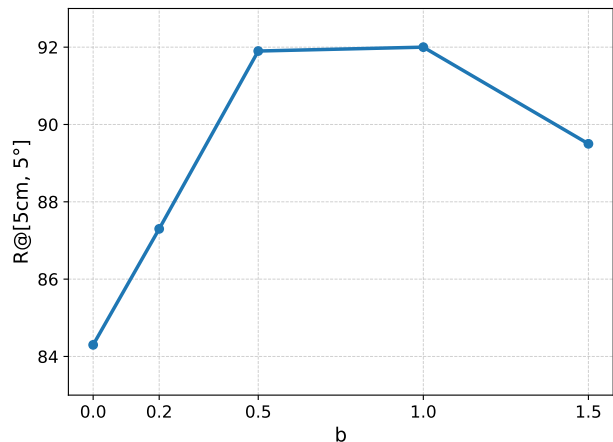

Figure II. The  $R@[5\text{cm}, 5^\circ]$  accuracy under different perturbation distance values  $b$ , with the perturbation angle  $a$  fixed to  $5^\circ$ .

degrade performance, as they place the perturbed poses too far from the true solution. Fig. II presents the complementary study in which the translation perturbation  $b$  is varied

Table III. The number of images in the training and test sets for each scene.

| 7-Scenes | Scenes | <i>Chess</i> | <i>Fire</i> | <i>Heads</i> | <i>Office</i> | <i>Pumpkin</i> | <i>Kitchen</i> | <i>Stairs</i> | - | - | - | - | - |
|----------|--------|--------------|-------------|--------------|---------------|----------------|----------------|---------------|---|---|---|---|---|
|          | Train  | 4000         | 2000        | 1000         | 6000          | 4000           | 7000           | 2000          | - | - | - | - | - |
| Test     | 2000   | 2000         | 1000        | 4000         | 2000          | 5000           | 1000           | -             | - | - | - | - | - |

  

| 12-Scenes | Scenes | <i>Kitchen-1</i> | <i>Living-1</i> | <i>Bed</i> | <i>Kitchen-2</i> | <i>Living-2</i> | <i>Luke</i> | <i>Gates362</i> | <i>Gates381</i> | <i>Lounge</i> | <i>Manolis</i> | <i>5a</i> | <i>5b</i> |
|-----------|--------|------------------|-----------------|------------|------------------|-----------------|-------------|-----------------|-----------------|---------------|----------------|-----------|-----------|
|           | Train  | 744              | 1035            | 890        | 782              | 731             | 1370        | 3540            | 2950            | 933           | 1623           | 1000      | 1391      |
| Test      | 357    | 493              | 244             | 230        | 359              | 624             | 386         | 1053            | 327             | 807           | 497            | 405       |           |

  

| Cambridge | Scenes | <i>Court</i> | <i>College</i> | <i>Hospital</i> | <i>Church</i> | <i>Shop</i> | - | - | - | - | - | - |
|-----------|--------|--------------|----------------|-----------------|---------------|-------------|---|---|---|---|---|---|
|           | Train  | 1531         | 1220           | 895             | 1487          | 231         | - | - | - | - | - | - |
| Test      | 760    | 343          | 182            | 530             | 103           | -           | - | - | - | - | - | - |

Table IV. The rendered image quality on the test set for each scene.

| 7-Scenes | Scenes | <i>Chess</i> | <i>Fire</i> | <i>Heads</i> | <i>Office</i> | <i>Pumpkin</i> | <i>Kitchen</i> | <i>Stairs</i> | - | - | - | - | - |
|----------|--------|--------------|-------------|--------------|---------------|----------------|----------------|---------------|---|---|---|---|---|
|          | PSNR   | 24.76        | 22.29       | 18.90        | 22.29         | 24.99          | 21.29          | 19.70         | - | - | - | - | - |

  

| 12-Scenes | Scenes | <i>Kitchen-1</i> | <i>Living-1</i> | <i>Bed</i> | <i>Kitchen-2</i> | <i>Living-2</i> | <i>Luke</i> | <i>Gates362</i> | <i>Gates381</i> | <i>Lounge</i> | <i>Manolis</i> | <i>5a</i> | <i>5b</i> |
|-----------|--------|------------------|-----------------|------------|------------------|-----------------|-------------|-----------------|-----------------|---------------|----------------|-----------|-----------|
|           | PSNR   | 20.66            | 26.66           | 27.46      | 25.82            | 24.33           | 23.91       | 20.63           | 22.82           | 22.85         | 20.31          | 26.81     | 17.72     |

  

| Cambridge | Scenes | <i>Court</i> | <i>College</i> | <i>Hospital</i> | <i>Church</i> | <i>Shop</i> | - | - | - | - | - | - |
|-----------|--------|--------------|----------------|-----------------|---------------|-------------|---|---|---|---|---|---|
|           | PSNR   | 14.42        | 12.79          | 13.84           | 14.30         | 14.48       | - | - | - | - | - | - |

Table V. The relocalization accuracy for each scene on the 12-Scenes dataset.

| Scenes            | <i>Kitchen-1</i> | <i>Living-1</i> | <i>Bed</i> | <i>Kitchen-2</i> | <i>Living-2</i> | <i>Luke</i> | <i>Gates362</i> | <i>Gates381</i> | <i>Lounge</i> | <i>Manolis</i> | <i>5a</i> | <i>5b</i> |
|-------------------|------------------|-----------------|------------|------------------|-----------------|-------------|-----------------|-----------------|---------------|----------------|-----------|-----------|
| Avg. Err [cm/°] ↓ | 0.29/0.18        | 0.25/0.12       | 0.24/0.11  | 0.25/0.17        | 0.25/0.12       | 0.45/0.18   | 0.32/0.13       | 0.30/0.13       | 0.48/0.14     | 0.32/0.13      | 0.37/0.16 | 0.36/0.14 |
| R@[2cm, 2°] ↑     | 98.3             | 100             | 99.6       | 100              | 100             | 97.3        | 99.7            | 98.8            | 96.9          | 93.1           | 96.6      | 86.9      |

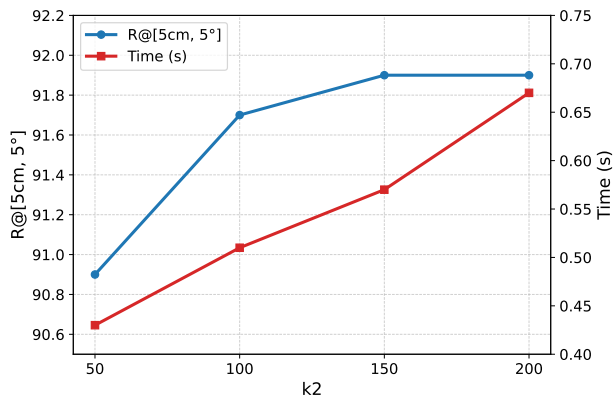

Figure III. The R@[5cm, 5°] accuracy and the average initial relocalization time under different values of  $k_2$ .

on the Stairs scene. Introducing a small positional perturbation (e.g.,  $b = 0.2$  m) already produces a noticeable improvement, and the performance peaks at moderate magnitudes ( $b = 0.5$ – $1.0$  m). When the perturbation becomes too large (e.g.,  $b = 1.5$  m), the accuracy drops, as the perturbed viewpoints deviate excessively from plausible poses and reduce the reliability of the rendered feature cues. Based on these observations, we adopt ( $a = 5^\circ, b = 0.5$  m) as the default configuration in the adaptive retrieval pipeline.

**Number of perturbations.** A larger  $k_2$  provides more pose-perturbed virtual views, increasing the chance of find-

ing a viewpoint closer to the query. As shown in Fig. III, the recall R@[5cm, 5°] on the Stairs scene improves rapidly when  $k_2$  increases from 50 to 100, and marginally from 100 to 150, while no further gain is observed at  $k_2 = 200$ . In contrast, the initialization time grows approximately linearly with  $k_2$ , since more virtual views are rendered and verified. Considering this trade-off between accuracy and efficiency, we adopt  $k_2 = 150$  for indoor scene.

**Visualization.** Fig. IV provides a qualitative visualization of the Adaptive Viewpoint Retrieval process. The coarse retrieval stage selects reference images with limited viewpoint overlap due to the sparse image observations, resulting in only a small number of geometrically consistent matches. After synthesizing pose-perturbed virtual views, the fine retrieval stage identifies reference images that are significantly closer to the query viewpoint. This leads to a substantial increase in co-visible regions and a much larger set of verified inliers, as illustrated by the dense green correspondences on the right.

## B. Scene Metadata

We report the number of training and test images for each scene in the 7-Scenes, 12-Scenes, and Cambridge Landmarks datasets in Table III. Moreover, we apply sky and dynamic-object masks to exclude these regions from supervision, preventing their instability from degrading the FGS training process in the Cambridge Landmarks dataset.

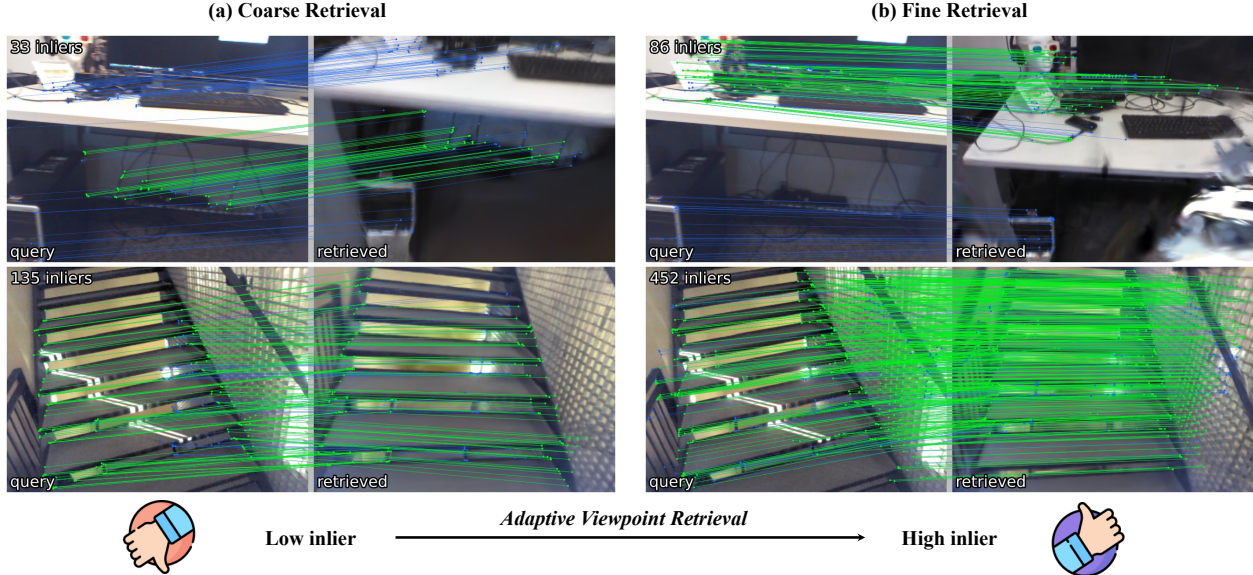

Figure IV. Qualitative visualization of the Adaptive Viewpoint Retrieval process. Green lines denote the inlier correspondences that pass geometric verification, whereas the other matches are visualized in blue. (a) Coarse retrieval often yields candidates with limited co-visibility and low inlier counts. (b) By synthesizing pose-perturbed virtual views and performing fine retrieval, our method significantly increases co-visibility, resulting in substantially more inliers.

### C. Mapping Quality

We report the PSNR of the FGS models trained within our SplatHLoc framework for each scene in Table IV. In indoor scenes, the PSNR typically reaches around 20 dB, while in outdoor scenes it is closer to 15 dB. This trend is consistent with the characteristics of the datasets: indoor environments contain more stable lighting conditions and richer geometric structures, enabling the FGS model to fit the scene appearance more accurately. In contrast, outdoor scenes exhibit stronger illumination changes, dynamic elements, and larger viewpoint variations, making high-fidelity rendering more challenging. Moreover, the Cambridge Landmarks dataset provides fewer training images for each scene. Nevertheless, the obtained PSNR values demonstrate that the trained FGS maps retain sufficient photometric fidelity to support robust retrieval and matching within our pipeline.

### D. Additional Experimental Results

**12-Scenes.** We report the relocalization results of our SplatHLoc on each scene of the 12-Scenes dataset in Table V. Across all scenes, our method achieves low translation and rotation errors, with most scenes exhibiting average errors below 0.3 cm and  $0.15^\circ$ . The corresponding recall under the stringent  $R@[2\text{ cm}, 2^\circ]$  metric reaches nearly 100% on the majority of scenes, demonstrating the robustness of SplatHLoc in challenging indoor environments.

**Map size.** Our method requires storing additional VPR features of database images during the mapping process. In Table 4 (main text), we only compared the size of the FGS

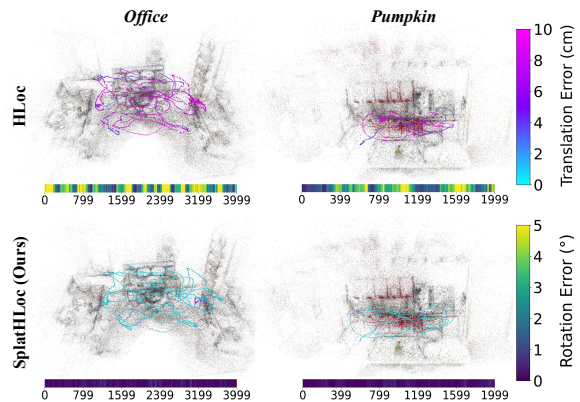

Figure V. Additional comparison of camera pose estimation errors for the 7-Scenes dataset.

map. For the chess scene, storing the VPR features requires 62.50 MB. Nonetheless, the total map size of our method for the chess scene remains less than half that of STDLoc.

### E. Additional Visualization

**Relocalization error.** Fig. V shows a comparison of the camera pose estimation errors in the *Office* and *Pumpkin* scenes. The error maps further show that SplatHLoc reduces outlier predictions and maintains lower errors across the entire sequence, demonstrating superior robustness in challenging indoor scenes. For trajectory points exceeding the upper error limit ( $10\text{cm}, 2^\circ$ ), the color is set to the value corresponding to that limit.

Fig. VII provides qualitative visualizations of the relo-

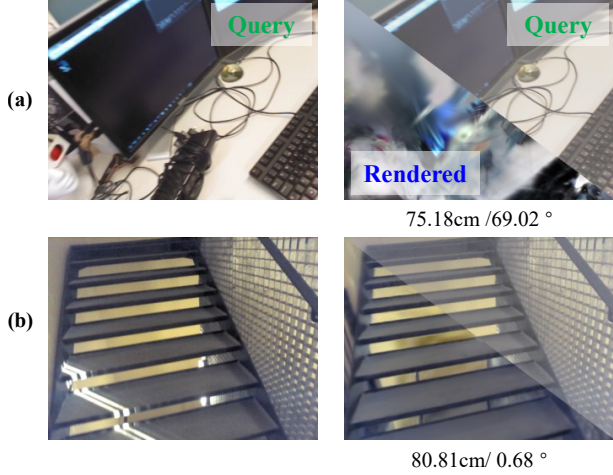

Figure VI. Visualization of the failure cases. (a) The first row illustrates a failure case caused by poor rendering quality of the Gaussian map near sparsely observed viewpoints. (b) The second row shows a failure induced by repetitive structures in the scene.

calization errors across all scenes in the Cambridge Landmarks dataset. Across Court, College, Hospital, Shop, and Church, the rendered views closely align with the corresponding query images, demonstrating that SplatHLoc achieves highly accurate pose estimation even in large-scale outdoor environments.

In Fig. VIII, we visualize the relocalization errors for each scene in the 7-Scenes dataset. Across all scenes, SplatHLoc consistently produces well-aligned query-rendered pairs, demonstrating the robustness and reliability of our approach under varying levels of texture, clutter, and viewpoint change.

**Failure Cases.** Fig. VI presents representative failure cases observed during evaluation. In case (a), the failure arises from poor rendering quality near sparsely observed viewpoints in the training set. When the Gaussian map does not sufficiently cover a region, the synthesized image deviates significantly from the true appearance, leading to ultimately incorrect pose estimation. Case (b) shows a different type of failure induced by highly repetitive structures in the scene. In such environments, distinct locations may produce visually similar local patterns, causing the feature matching stage to converge to an incorrect alignment despite low rotational ambiguity. These cases highlight challenging scenarios where even high-quality novel view synthesis may be insufficient for accurate relocalization.

## F. Gaussian Rasterization in FGS

We adopt the differentiable rasterization procedure of 3D Gaussian Splatting. Each Gaussian primitive is parameterized as  $\mathcal{G}_i = \{\mathbf{x}_i, \mathbf{q}_i, \mathbf{s}_i, \alpha_i, \mathbf{c}_i, \mathbf{f}_i\}$ , where  $\mathbf{x}_i \in \mathbb{R}^3$  denotes the center,  $\mathbf{q}_i$  the rotation,  $\mathbf{s}_i$  the anisotropic scale,  $\alpha_i$  the base opacity,  $\mathbf{c}_i$  the color, and  $\mathbf{f}_i \in \mathbb{R}^d$  the feature vector.

**3D covariance in world coordinates.** The intrinsic 3D covariance of Gaussian  $i$  in the world coordinate frame is

$$\Sigma_{i,\text{world}}^{3D} = R(\mathbf{q}_i) \text{diag}(\mathbf{s}_i^2) R(\mathbf{q}_i)^\top, \quad (\text{I})$$

where  $R(\mathbf{q}_i)$  is the rotation matrix associated with quaternion  $\mathbf{q}_i$ .

**Transformation to the camera frame.** Given the viewing transformation  $W \in \text{SO}(3)$  (the rotation of world-to-camera pose), the 3D covariance in the camera coordinate system becomes

$$\Sigma_{i,\text{cam}}^{3D} = W \Sigma_{i,\text{world}}^{3D} W^\top. \quad (\text{II})$$

**Projection to the image plane.** Under the camera projection  $\pi : \mathbb{R}^3 \rightarrow \mathbb{R}^2$ , the corresponding 2D covariance is obtained by linearizing  $\pi$  at the Gaussian center:

$$\Sigma_i^{2D} = J_i \Sigma_{i,\text{cam}}^{3D} J_i^\top, \quad J_i = \left. \frac{\partial \pi(\mathbf{x})}{\partial \mathbf{x}} \right|_{\mathbf{x}=\mathbf{x}_i}. \quad (\text{III})$$

**Projected kernel and opacity.** The 2D Gaussian kernel on the image plane is

$$G_i(\mathbf{u}) = \exp\left(-\frac{1}{2}(\mathbf{u} - \mu_i)^\top (\Sigma_i^{2D})^{-1}(\mathbf{u} - \mu_i)\right), \quad (\text{IV})$$

where  $\mu_i = \pi(\mathbf{x}_i)$ . The per-pixel opacity is

$$\alpha_i(\mathbf{u}) = \alpha_i G_i(\mathbf{u}). \quad (\text{V})$$

**Volume compositing.** Given Gaussians sorted in front-to-back order, the accumulated transmittance is

$$T_i = \prod_{j < i} (1 - \alpha_j). \quad (\text{VI})$$

The rendered color is obtained via alpha compositing:

$$\mathbf{C}(\mathbf{u}) = \sum_{i \in \mathcal{N}(\mathbf{u})} \mathbf{c}_i \alpha_i(\mathbf{u}) T_i(\mathbf{u}), \quad (\text{VII})$$

where  $\mathcal{N}(\mathbf{u})$  denotes the Gaussians influencing pixel  $\mathbf{u}$ .

**Depth and feature rendering.** Depth rendering replaces the color with the camera-space depth  $z_i$ :

$$\mathbf{D}(\mathbf{u}) = \sum_{i \in \mathcal{N}(\mathbf{u})} z_i \alpha_i(\mathbf{u}) T_i(\mathbf{u}). \quad (\text{VIII})$$

Feature rendering follows the similar form:

$$\mathbf{F}(\mathbf{u}) = \text{norm} \left( \sum_{i \in \mathcal{N}(\mathbf{u})} \text{norm}(\mathbf{f}_i) \alpha_i(\mathbf{u}) T_i(\mathbf{u}) \right), \quad (\text{IX})$$

where  $\text{norm}(\cdot)$  denotes the L2 normalization operation.

**Differentiability.** All operations—covariance transformation, projection, kernel evaluation, opacity accumulation, and compositing—are differentiable with respect to  $\{\mathbf{x}_i, \mathbf{q}_i, \mathbf{s}_i, \alpha_i, \mathbf{c}_i, \mathbf{f}_i\}$ , enabling the end-to-end optimization of all Gaussian attributes.

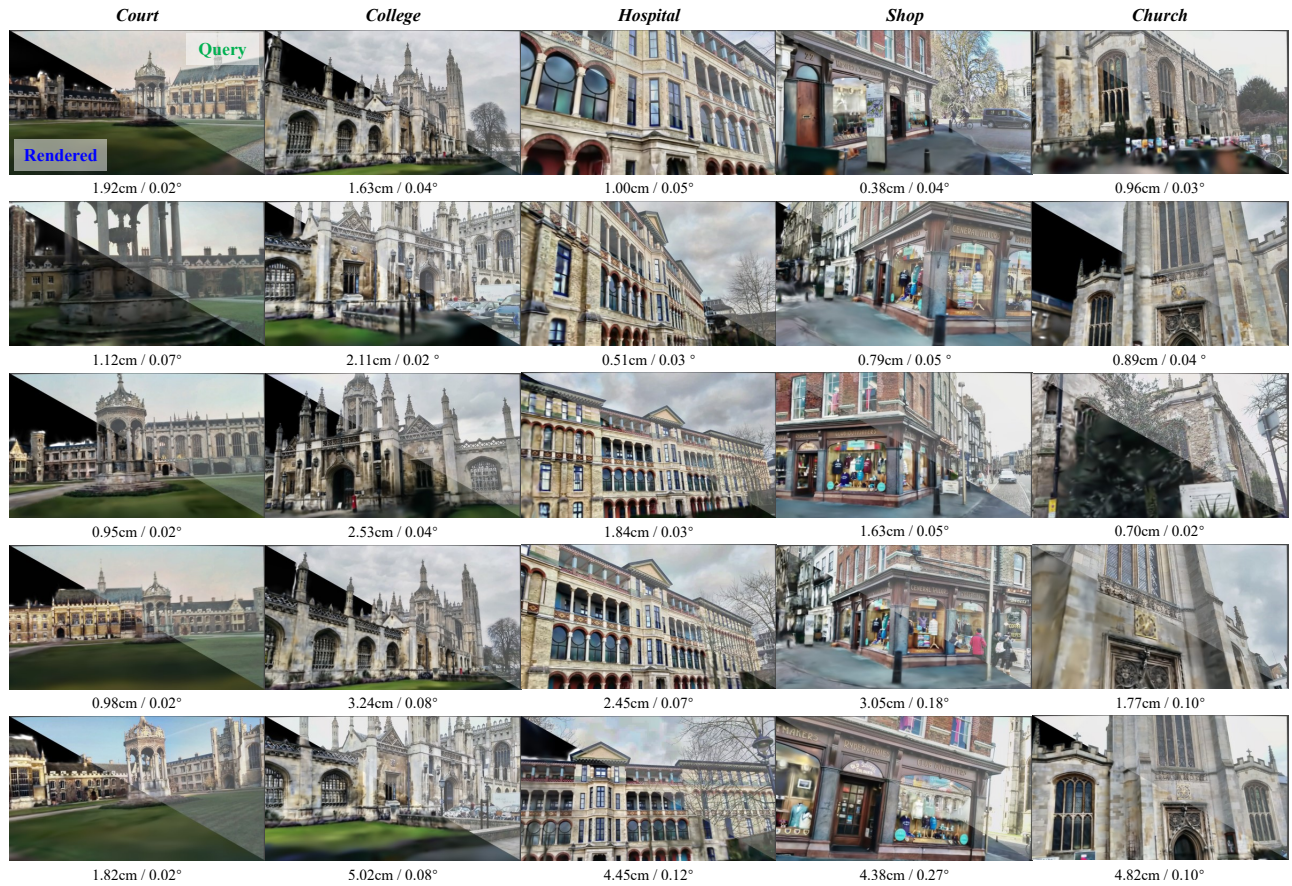

Figure VII. Qualitative visualization of the relocalization errors on the Cambridge Landmarks dataset. For each image pair, the upper-left triangle shows the query image, while the lower-right triangle displays the rendered image obtained from the final estimated pose. Better visual alignment between the two indicates that our SplatHLoc achieves more accurate relocalization.

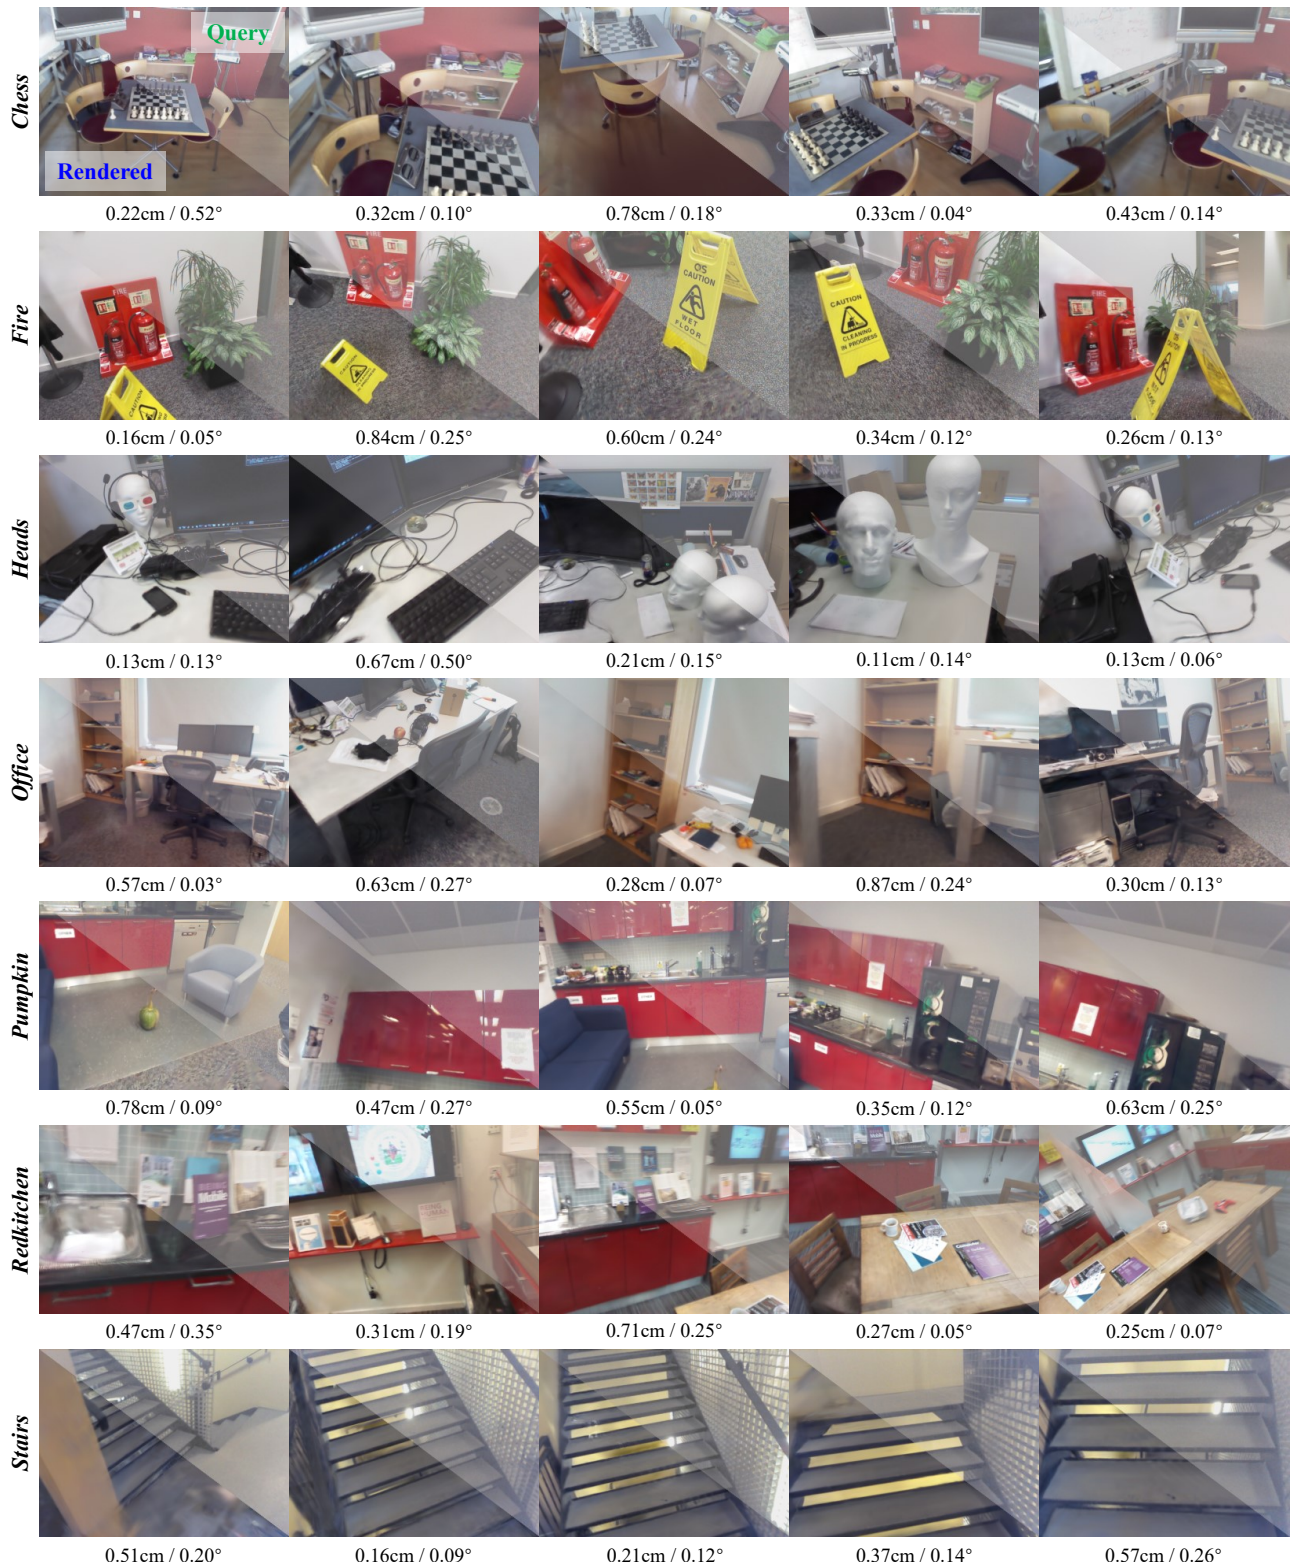

Figure VIII. Qualitative visualization of the relocalization errors on the 7-Scenes dataset. For each image pair, the upper-left triangle shows the query image, while the lower-right triangle displays the rendered image obtained from the final estimated pose. Better visual alignment between the two indicates that our SplatHLoc achieves more accurate relocalization.

---

**Algorithm 1** Adaptive Coarse-to-Fine Viewpoint Retrieval

---

**Require:** Query image  $I_q$ , Gaussian map  $\mathcal{G}$ , VPR model  $\mathcal{V}$ , sparse matcher  $\mathcal{M}_{\text{sparse}}$ , training images  $\{I_t\}$  with poses  $\{\mathbf{T}_t\}$ , retrieval hyperparameters  $(k_1, k_2, k_3, a, b, \mathcal{I})$ .

**Ensure:** Final candidate image  $I_c$  and its pose  $\mathbf{T}^*$  for  $I_q$ .

```
1: // Coarse viewpoint retrieval
2: Extract global descriptor  $\mathbf{v}_q = \mathcal{V}(I_q)$ .
3: Compute descriptors  $\{\mathbf{v}_t\}$  for all training images.
4: Retrieve top- $k_1$  neighbors  $\{I_c^1, \dots, I_c^{k_1}\}$  of  $I_q$ .
5: Initialize  $N^* \leftarrow 0$ ,  $\mathbf{T}^* \leftarrow \emptyset$ ,  $i^* \leftarrow -1$ .
6: for  $i = 1$  to  $k_1$  do
7:    $I_c \leftarrow I_c^i$ ;  $\mathbf{T}_c \leftarrow$  pose of  $I_c$  from  $\{\mathbf{T}_t\}$ .
8:   matches  $\leftarrow \mathcal{M}_{\text{sparse}}(I_q, I_c)$ .
9:   Estimate inliers  $\mathcal{I}_c$ .
10:   $N \leftarrow |\mathcal{I}_c|$ .
11:  if  $N > N^*$  then
12:     $N^* \leftarrow N$ ,  $\mathbf{T}^* \leftarrow \hat{\mathbf{T}}$ ,  $i^* \leftarrow i$ .
13:  end if
14:  if  $N^* \geq \mathcal{I}$  then
15:    break // sufficient inliers, stop coarse search
16:  end if
17: end for
18:  $I_c^c \leftarrow I_c^{i^*}$  // best coarse candidate image
19: // Fine retrieval via virtual novel viewpoints
20:  $I_c^f \leftarrow I_c^c$  // by default, fall back to the coarse candidate
21: if  $N^* < \mathcal{I}$  then
22:   Generate  $k_2$  perturbed poses  $\{\mathbf{T}_v^j\}_{j=1}^{k_2}$  around  $\mathbf{T}^*$  within  $(a^\circ, b \text{ m})$ .
23:   for  $j = 1$  to  $k_2$  do
24:     Render virtual view  $I_v^j = \text{Render}(\mathcal{G}, \mathbf{T}_v^j)$ .
25:     Extract descriptor  $\mathbf{v}_v^j = \mathcal{V}(I_v^j)$ .
26:   end for
27:   Build a VPR database with  $\{\mathbf{v}_v^j\}_{j=1}^{k_2}$ .
28:   Retrieve top- $k_3$  virtual views  $\{I_v^{j_1}, \dots, I_v^{j_{k_3}}\}$  for  $I_q$ .
29:   Initialize  $j^* \leftarrow -1$ .
30:   for each index  $j \in \{j_1, \dots, j_{k_3}\}$  do
31:     matches  $\leftarrow \mathcal{M}_{\text{sparse}}(I_q, I_v^j)$ .
32:     Estimate pose inliers  $\mathcal{I}_v$ .
33:      $N \leftarrow |\mathcal{I}_v|$ .
34:     if  $N > N^*$  then
35:        $N^* \leftarrow N$ ,  $\mathbf{T}^* \leftarrow \hat{\mathbf{T}}$ ,  $j^* \leftarrow j$ .
36:     end if
37:   end for
38:   if  $j^* \geq 0$  then
39:      $I_c^f \leftarrow I_v^{j^*}$  // best virtual candidate image
40:   end if
41: end if
42:  $I_c \leftarrow I_c^f$  // final candidate image
43: return  $I_c, \mathbf{T}^*$ .
```

---
